## Correction

## Correction for: PKMYT1, exacerbating the progression of clear cell renal cell carcinoma, is implied as a biomarker for the diagnosis and prognosis

Juan Chen<sup>1,\*</sup>, Xiaoliang Hua<sup>2,3,4,\*</sup>, Heying Chen<sup>1</sup>, Xiangmin Qiu<sup>1</sup>, Haibing Xiao<sup>2,3,4</sup>, Shengdong Ge<sup>2,3,4</sup>, Chaozhao Liang<sup>2,3,4</sup>, Qin Zhou<sup>1</sup>

<sup>1</sup>The Ministry of Education Key Laboratory of Laboratory Medical Diagnostics, The College of Laboratory Medicine, Chongqing Medical University, Chongqing 400016, China

<sup>2</sup>Department of Urology, The First Affiliated Hospital of Anhui Medical University, Hefei, China

<sup>3</sup>Anhui Province Key Laboratory of Genitourinary Diseases, Anhui Medical University, Hefei, China

<sup>4</sup>The Institute of Urology, Anhui Medical University, Hefei, China

\*Equal contribution

**Correspondence to:** Chaozhao Liang, Qin Zhou; **email:** [liang\\_chaozhao@ahmu.edu.cn](mailto:liang_chaozhao@ahmu.edu.cn), [zhouqin@cqmu.edu.cn](mailto:zhouqin@cqmu.edu.cn)

**Keywords:** renal cell carcinoma, PKMYT1, EMT, prognosis, diagnosis

**Original article:** *Aging (Albany NY)* 2021; 13: pp 25778–25798

PMID: [34959223](https://pubmed.ncbi.nlm.nih.gov/34959223/)

PMCID: [PMC8751600](https://pubmed.ncbi.nlm.nih.gov/PMC8751600/)

doi: [10.18632/aging.203759](https://doi.org/10.18632/aging.203759)

**This article has been corrected:** The authors forgot to add one more source of funding from Scientific and Technological Research Program of Chongqing Municipal Education Commission Grant No. KJQN202100418. The corrected text is presented below.

### FUNDING

This study was funded by Natural Science Foundation of Chongqing Science and Technology Bureau (cstc2021jcyj-msxm0317) to J.C., the Scientific and Technological Research Program of Chongqing Municipal Education Commission (Grant No. KJQN202100418) to J.C., the National Natural Science Foundation of China (82030065) to Q.Z., Scientific Research Foundation of the Institute for Translational Medicine of Anhui Province (2017ZHYX02) to C.Z.L. and Key project of Natural Science Research project of Anhui Province (KJ2019A0280) and National Natural Science Foundation of China (81902584) to H.B.X.
